# Supplementary material for: K4(PO2F2)2(S2O7): first fluorooxophosphorsulfate with mixed-anion [S2O7]2−and [PO2F2]−groups
Source: Royal Society of Chemistry journal article supplement (doi:10.1039/d0dt03307c), 2020-01-01
Supplement: d0dt03307c1.pdf [file d0dt03307c1.pdf]

## $K_4(PO_2F_2)_2(S_2O_7)$ : First Fluorooxophosphorsulfate with Mixed-Anion

### $[S_2O_7]^{2-}$ and $[PO_2F_2]^-$ Groups

Wenyao Zhang,<sup>a, b</sup> Wenqi Jing,<sup>a, b</sup> Zhihua Yang,<sup>\*a, b</sup> Shilie Pan<sup>\*a, b</sup>

<sup>a</sup>CAS Key Laboratory of Functional Materials and Devices for Special Environments, Xinjiang Technical Institute of Physics & Chemistry, CAS, and Xinjiang Key Laboratory of Electronic Information Materials and Devices, 40-1 South Beijing Road, Urumqi 830011, China

<sup>b</sup>Center of Materials Science and Optoelectronics Engineering, University of Chinese Academy of Sciences, Beijing 100049, China

\*To whom correspondence should be addressed. Phone: (+86)991-3674558.

Fax: (+86)991-3838957. E-mail: slpan@ms.xjb.ac.cn (S. Pan).

Table S1. Atomic coordinates ( $\times 10^4$ ) and equivalent isotropic displacement parameters ( $\text{\AA}^2 \times 10^3$ ) and BVS for  $\text{K}_4(\text{PO}_2\text{F}_2)_2(\text{S}_2\text{O}_7)$ .  $U_{\text{eq}}$  is defined as one-third of the trace of the orthogonalized  $U_{ij}$  tensor.

| Atom | S.O.F | x       | y       | z       | U(eq) | BVS  |
|------|-------|---------|---------|---------|-------|------|
| K(1) | 1     | 2981(1) | 3362(1) | 1872(1) | 37(1) | 1.06 |
| K(2) | 1     | 4129(1) | 6289(1) | 411(1)  | 35(1) | 1.14 |
| S(1) | 1     | 1413(1) | 3021(1) | 2943(1) | 28(1) | 5.99 |
| P(1) | 1     | 4465(1) | 1827(2) | 695(1)  | 26(1) | 5.27 |
| O(1) | 1     | 4221(3) | 2689(4) | -76(2)  | 38(1) | 2.10 |
| O(2) | 1     | 4597(3) | 2865(4) | 1386(2) | 39(1) | 2.04 |
| O(3) | 1     | 2283(3) | 4597(4) | 3248(2) | 43(1) | 1.78 |
| O(4) | 1     | 1241(3) | 2069(4) | 2214(2) | 42(1) | 2.09 |
| O(5) | 1     | 1806(3) | 1963(4) | 3715(2) | 44(1) | 2.13 |
| O(6) | 1     | 0       | 3998(5) | 2500    | 28(1) | 2.10 |
| F(1) | 1     | 3439(3) | 367(4)  | 351(2)  | 60(1) | 1.18 |
| F(2) | 1     | 5721(3) | 659(4)  | 1173(2) | 62(1) | 1.09 |

Table S2. Selected bond distances (Å) and angles (deg) for  $K_4(PO_2F_2)_2(S_2O_7)$ 

|                         |          |                |            |
|-------------------------|----------|----------------|------------|
| K(1)-O(2) <sup>#1</sup> | 2.756(5) | S(1)-O(5)      | 1.445(3)   |
| K(1)-O(1) <sup>#2</sup> | 2.809(5) | S(1)-O(3)      | 1.478(3)   |
| K(1)-O(2)               | 2.812(5) | S(1)-O(6)      | 1.623(3)   |
| K(1)-O(3) <sup>#3</sup> | 2.852(5) | P(1)-O(1)      | 1.440(3)   |
| K(1)-F(2) <sup>#4</sup> | 2.893(5) | P(1)-O(2)      | 1.442(3)   |
| K(1)-O(4)               | 2.895(5) | P(1)-F(1)      | 1.516(3)   |
| K(1)-O(5) <sup>#5</sup> | 3.016(5) | P(1)-F(2)      | 1.535(3)   |
| K(1)-O(4) <sup>#5</sup> | 3.098(5) | O(4)-S(1)-O(5) | 115.8(2)   |
| K(1)-O(3)               | 3.405(4) | O(4)-S(1)-O(3) | 112.5(2)   |
| K(2)-O(5) <sup>#5</sup> | 2.664(4) | O(5)-S(1)-O(3) | 111.4(2)   |
| K(2)-O(1) <sup>#6</sup> | 2.712(4) | O(4)-S(1)-O(6) | 107.66(17) |
| K(2)-O(4) <sup>#7</sup> | 2.742(5) | O(5)-S(1)-O(6) | 108.63(16) |
| K(2)-O(1)               | 2.896(5) | O(3)-S(1)-O(6) | 99.3(2)    |
| K(2)-F(1) <sup>#2</sup> | 2.929(5) | O(1)-P(1)-O(2) | 120.1(2)   |
| K(2)-O(5) <sup>#8</sup> | 2.953(5) | O(1)-P(1)-F(1) | 109.43(19) |
| K(2)-O(2)               | 3.005(5) | O(2)-P(1)-F(1) | 110.05(19) |
| K(2)-F(1) <sup>#9</sup> | 3.185(5) | O(1)-P(1)-F(2) | 108.40(19) |
| K(2)-O(3) <sup>#8</sup> | 3.225(5) | O(2)-P(1)-F(2) | 108.3(2)   |
| S(1)-O(4)               | 1.445(3) | F(1)-P(1)-F(2) | 98.2(2)    |

Symmetry transformations used to generate equivalent atoms:

|                      |                            |                            |
|----------------------|----------------------------|----------------------------|
| #1 $-x+1, y, -z+1/2$ | #2 $-x+1/2, -y+1/2, -z$    | #3 $-x+1/2, y-1/2, -z+1/2$ |
| #4 $x-1/2, y+1/2, z$ | #5 $-x+1/2, y+1/2, -z+1/2$ | #6 $-x+1, -y+1, -z$        |
| #7 $x+1/2, y+1/2, z$ | #8 $x, -y+1, z-1/2$        | #9 $x, y+1, z$             |

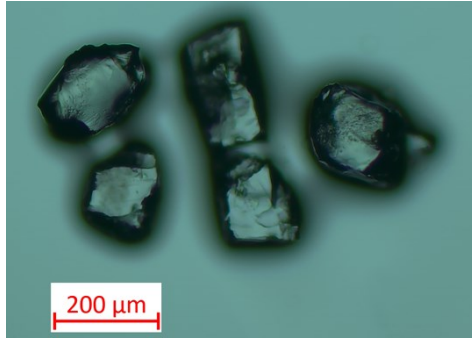

Figure S1 Photograph of crystals of KSPOF.

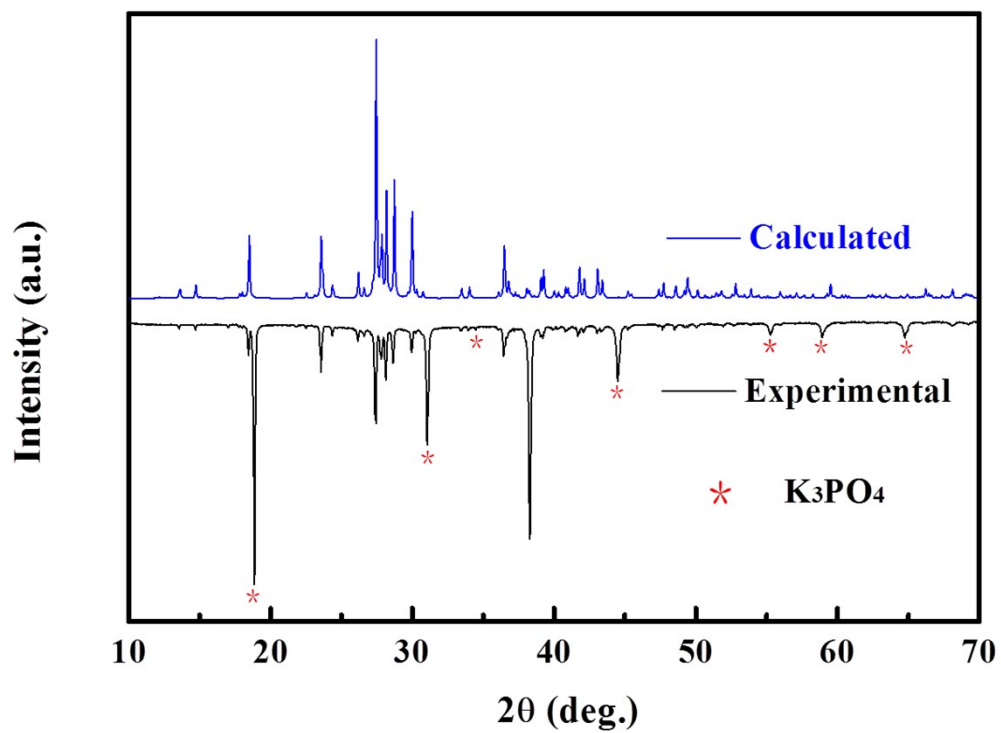

Figure S2 Powder X-ray diffraction patterns of K<sub>3</sub>PO<sub>4</sub> in comparison to the calculated one from the single crystal data.

Table S3 The BVS and GII values in  $K_4(PO_2F_2)_2(S_2O_7)$

| Compounds              | BVS<br>K <sup>+</sup> | GII   |
|------------------------|-----------------------|-------|
| $K_4(PO_2F_2)(S_2O_7)$ | 1.06-1.14             | 0.138 |

### Birefringence Measurements.

The birefringences of KSPOF were characterized by using the polarizing microscope equipped (ZEISS Axio Scope A1) with Berek compensator. The wavelength of the light source was 546 nm. Before the scanning, the small and transparent KSPOF lamellar crystals were chosen to measure, in order to improve the accuracy of the birefringences. The formula for calculating the birefringence is listed below,

$$R = | N_e - N_o | \times T = \Delta n \times T \text{ Eq. (1)}$$

Here, R represents the optical path difference,  $\Delta n$  means the birefringence, and T denotes the thickness of the crystal.

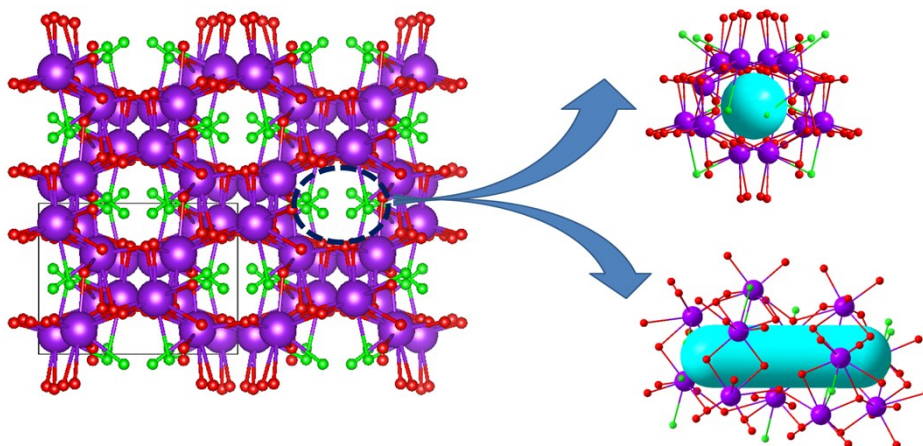

Figure S3 Two types of the [KOF] polyhedra connect with each other via corner-sharing or edge-sharing to form a three-dimension (3D) framework and eight-membered ring (8-MRs) channel.



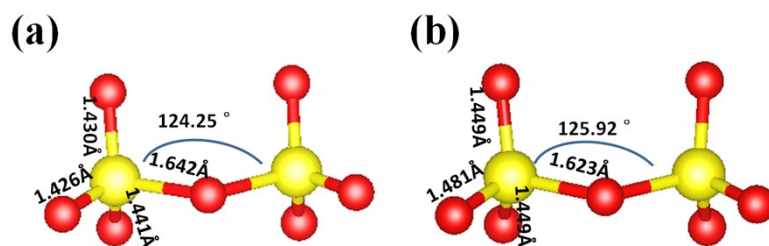

Figure S4 The dimer  $[\text{S}_2\text{O}_7]^{2-}$  unit in (a)  $\text{K}_2\text{S}_2\text{O}_7$  and (b)  $\text{KSPOF}$

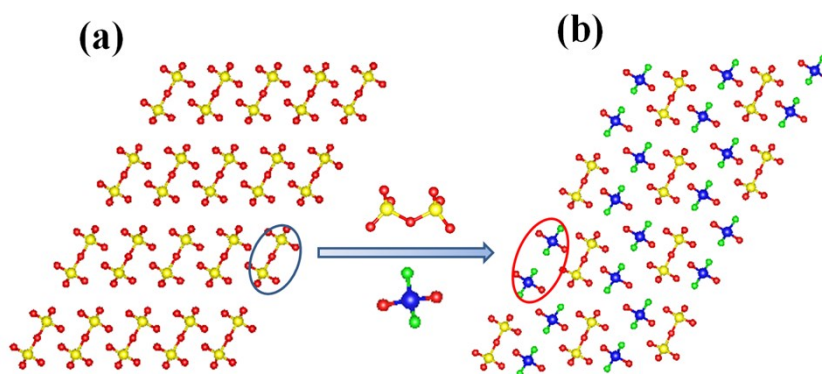

Figure S5 Anion arrangement manners (a) the isolated  $[S_2O_7]^{2-}$  dimers and (b) the isolated  $[S_2O_7]^{2-}$  and isolated  $[PO_2F_2]^-$  anion groups.

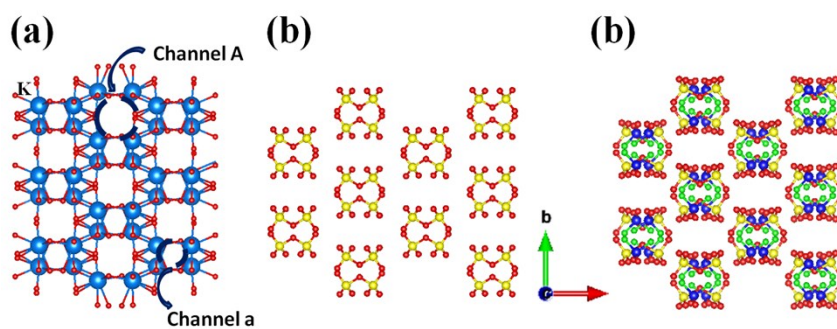

Figure S6 (a) The 3D framework of K-O in  $K_2S_2O_7$  and (b) different clusters in  $K_2S_2O_7$  and  $KSPOF$ .

Table S4 Anhydrous and disorder-free compounds

| No. | Structural formula                                                            | Space group              | S-O units                                | P-O/F units                               | ICSD ode/Ref.    |
|-----|-------------------------------------------------------------------------------|--------------------------|------------------------------------------|-------------------------------------------|------------------|
| 1   | $\text{KSb}_2(\text{SO}_4)_2(\text{PO}_4)$                                    | $P\bar{1}$               | $\text{SO}_4$                            | $\text{PO}_4$                             | 430367           |
| 2   | $\text{RbSb}_2(\text{SO}_4)_2(\text{PO}_4)$                                   | $P\bar{1}$               | $\text{SO}_4$                            | $\text{PO}_4$                             | 430368           |
| 3   | $\text{Na}_2\text{La}[\text{PO}_4][\text{S}_2\text{O}_3]$                     | $P2_1/c$                 | $\text{S}_2\text{O}_3$                   | $\text{PO}_4$                             | 154708           |
| 4   | <b><math>\text{K}_4(\text{PO}_2\text{F}_2)_2(\text{S}_2\text{O}_7)</math></b> | <b><math>C2/c</math></b> | <b><math>\text{S}_2\text{O}_7</math></b> | <b><math>\text{PO}_2\text{F}_2</math></b> | <b>This work</b> |

Table S5 Anhydrous and disorder compounds

| No. | Structural formula                                                                                 | Space group  | S-O units     | P-O/F units   | ICSD Code/Ref. |
|-----|----------------------------------------------------------------------------------------------------|--------------|---------------|---------------|----------------|
| 1   | $\text{NaFe}_2(\text{PO}_4)(\text{SO}_4)_2$                                                        | $R\bar{3}cH$ | $\text{SO}_4$ | $\text{PO}_4$ | 264480         |
| 2   | $\text{Pb}_4(\text{PO}_4)_2(\text{SO}_4)$                                                          | $I\bar{4}3d$ | $\text{SO}_4$ | $\text{PO}_4$ | 79126          |
| 3   | $\text{Zr}_2(\text{PO}_4)_2(\text{SO}_4)$                                                          | $Pbcn$       | $\text{SO}_4$ | $\text{PO}_4$ | 202395         |
| 4   | $\text{Ca}_{9.84}((\text{SiO}_4)_{2.4}(\text{PO}_4)_{1.2}(\text{SO}_4)_{2.4})\text{Cl}_{1.6}$<br>7 | $P6_3/m$     | $\text{SO}_4$ | $\text{PO}_4$ | 237973         |
| 5   | $\text{Ca}_{10}(\text{PO}_4)_{4.67}(\text{SO}_4)_{0.66}(\text{SiO}_4)_{0.66}\text{Cl}_2$           | $P6_3/m$     | $\text{SO}_4$ | $\text{PO}_4$ | 237975         |

Table S6 Hydrous and disorder-free compounds

| No. | Structural formula                                                                                         | Space group  | S-O units     | P-O/F units   | ICSD Code/Ref. |
|-----|------------------------------------------------------------------------------------------------------------|--------------|---------------|---------------|----------------|
| 1   | $\text{Na}(\text{HSO}_4)(\text{H}_3\text{PO}_4)$                                                           | $P2_1$       | $\text{SO}_4$ | $\text{PO}_4$ | 411163         |
| 2   | $\text{Pb}_2\text{Cu}(\text{PO}_4)(\text{SO}_4)(\text{OH})$                                                | $P2_1/m$     | $\text{SO}_4$ | $\text{PO}_4$ | 76613          |
| 3   | $\text{PbFe}_3(\text{SO}_4)(\text{PO}_4)(\text{OH})_6$                                                     | $R3mH$       | $\text{SO}_4$ | $\text{PO}_4$ | 68352          |
| 4   | $\text{Rb}_2(\text{HSO}_4)(\text{H}_2\text{PO}_4)$                                                         | $P2_1/c$     | $\text{SO}_4$ | $\text{PO}_4$ | 410918         |
| 5   | $\text{Rb}_4(\text{HSO}_4)_3(\text{H}_2\text{PO}_4)$                                                       | $P2_12_12$   | $\text{SO}_4$ | $\text{PO}_4$ | 410919         |
| 6   | $\text{Cs}_3(\text{HSO}_4)_2(\text{H}_2\text{PO}_4)$                                                       | $C2/c$       | $\text{SO}_4$ | $\text{PO}_4$ | 429151         |
| 7   | $\text{Cs}_6\text{H}(\text{HSO}_4)_3(\text{H}_2\text{PO}_4)_4$                                             | $I\bar{4}3d$ | $\text{SO}_4$ | $\text{PO}_4$ | 256209         |
| 8   | $\text{Al}_2(\text{PO}_4)(\text{SO}_4)(\text{OH})\cdot(\text{H}_2\text{O})_9$                              | $P2_1/n$     | $\text{SO}_4$ | $\text{PO}_4$ | 181637         |
| 9   | $\text{Al}_3(\text{PO}_4)(\text{SO}_4)_2(\text{OH})_2(\text{H}_2\text{O})_{10}\cdot(\text{H}_2\text{O})_4$ | $P\bar{1}$   | $\text{SO}_4$ | $\text{PO}_4$ | 189132         |

Table S7 Hydrous and disorder compounds

| No. | Structural formula                                                                                                                                   | Space group  | S-O units       | P-O/F units       | ICSD Code/Ref. |
|-----|------------------------------------------------------------------------------------------------------------------------------------------------------|--------------|-----------------|-------------------|----------------|
| 1   | $K_4(\text{HSO}_4)_3(\text{H}_2\text{PO}_4)$                                                                                                         | $P\bar{1}$   | SO <sub>4</sub> | PO <sub>4</sub>   | 411162         |
| 2   | $K_2(\text{HSO}_4)(\text{H}_2\text{PO}_4)$                                                                                                           | $P2_1/c$     | SO <sub>4</sub> | PO <sub>4</sub>   | 411161         |
| 3   | $\text{Cs}_4(\text{HSO}_4)_3(\text{H}_2\text{PO}_4)$                                                                                                 | $I41/amdZ$   | SO <sub>4</sub> | PO <sub>4</sub>   | 257883         |
| 4   | $\text{Al}_2\text{F}(\text{PO}_4)(\text{SO}_4)\cdot 9\text{H}_2\text{O}$                                                                             | $P2/a$       | SO <sub>4</sub> | PO <sub>4</sub>   | 241342         |
| 5   | $\text{CaAl}_3(\text{PO}_4)(\text{SO}_4)(\text{OH})_6$                                                                                               | $R\bar{3}mH$ | SO <sub>4</sub> | PO <sub>4</sub>   | 40087          |
| 6   | $\text{SrAl}_3(\text{PO}_4)(\text{SO}_4)(\text{OH})_6$                                                                                               | $R\bar{3}mH$ | SO <sub>4</sub> | PO <sub>4</sub>   | 34345          |
| 7   | $(\text{Cs}_3(\text{HSO}_4)_2(\text{H}_2\text{PO}_4))_{1.3333}$                                                                                      | $I41/amdZ$   | SO <sub>4</sub> | PO <sub>4</sub>   | 257881         |
| 8   | $(\text{Cs}_3(\text{HSO}_4)_2(\text{H}_2\text{PO}_4))_{0.3333}$                                                                                      | $Pm\bar{3}m$ | SO <sub>4</sub> | PO <sub>4</sub>   | 257882         |
| 9   | $(\text{Cs}_4(\text{HSO}_4)_3(\text{H}_2\text{PO}_4))_{0.25}$                                                                                        | $Pm\bar{3}m$ | SO <sub>4</sub> | PO <sub>4</sub>   | 257884         |
| 10  | $\text{Cs}_3(\text{HSO}_4)_2(\text{H}_{1.5}\text{S}_{0.5}\text{P}_{0.5}\text{O}_4)$                                                                  | $C2/c$       | SO <sub>4</sub> | PO <sub>4</sub>   | 280111         |
| 11  | $\text{Cs}_2(\text{HSO}_4)(\text{H}_2\text{PO}_4)$                                                                                                   | $P2_1/n$     | SO <sub>4</sub> | PO <sub>4</sub>   | 280146         |
| 12  | $\text{Cs}_5(\text{HSO}_4)_3(\text{H}_2\text{PO}_4)_2$                                                                                               | $C2/c$       | SO <sub>4</sub> | PO <sub>4</sub>   | 51100          |
| 13  | $\text{Li}_6\text{Na}_{18}((\text{SO}_4)(\text{UO}_2)_{20}(\text{O}_2)_{27}(\text{HPO}_4)_6(\text{H}_2\text{PO}_4)_6)\cdot(\text{H}_2\text{O})_{42}$ | $P2_1/n$     | SO <sub>4</sub> | PO <sub>4</sub>   | 243540         |
| 14  | $\text{LiNa}_{18}((\text{SO}_4)(\text{UO}_2)_{20}(\text{O}_2)_{27}(\text{HPO}_4)_6)\cdot(\text{H}_2\text{O})_{40}$                                   | $P2/c$       | SO <sub>4</sub> | PO <sub>4</sub>   | 243539         |
| 15  | $\text{Rb}(\text{HSO}_4)_{0.43}(\text{H}_2\text{PO}_4)_{0.57}$                                                                                       | $P2_1/n$     | SO <sub>4</sub> | PO <sub>4</sub>   | 410917         |
| 16  | $\text{Na}_2\text{Co}(\text{SO}_4)_{1.8}(\text{PO}_3\text{F})_{0.2}\cdot(\text{H}_2\text{O})_2$                                                      | $P\bar{1}$   | SO <sub>4</sub> | PO <sub>3</sub> F | 253311         |
| 17  | $\text{Na}_2\text{Co}(\text{SO}_4)_{1.9}(\text{PO}_3\text{F})_{0.1}\cdot(\text{H}_2\text{O})_2$                                                      | $P\bar{1}$   | SO <sub>4</sub> | PO <sub>3</sub> F | 253309         |
| 18  | $\text{Na}_2\text{Co}(\text{SO}_4)_{1.75}(\text{PO}_3\text{F})_{0.25}\cdot(\text{H}_2\text{O})_2$                                                    | $P\bar{1}$   | SO <sub>4</sub> | PO <sub>3</sub> F | 253312         |
| 19  | $\text{Na}_2\text{Co}(\text{SO}_4)_{1.85}(\text{PO}_3\text{F})_{0.15}\cdot(\text{H}_2\text{O})_2$                                                    | $P\bar{1}$   | SO <sub>4</sub> | PO <sub>3</sub> F | 253310         |
| 20  | $\text{Na}_2\text{Cu}(\text{SO}_4)_{1.7}(\text{PO}_3\text{F})_{0.3}\cdot(\text{H}_2\text{O})_2$                                                      | $P\bar{1}$   | SO <sub>4</sub> | PO <sub>3</sub> F | 253315         |
| 21  | $\text{Na}_2\text{Cu}(\text{SO}_4)_{1.8}(\text{PO}_3\text{F})_{0.2}\cdot(\text{H}_2\text{O})_2$                                                      | $P\bar{1}$   | SO <sub>4</sub> | PO <sub>3</sub> F | 253314         |
| 22  | $\text{Na}_2\text{Cu}(\text{SO}_4)_{1.9}(\text{PO}_3\text{F})_{0.1}\cdot(\text{H}_2\text{O})_2$                                                      | $P\bar{1}$   | SO <sub>4</sub> | PO <sub>3</sub> F | 253313         |
| 23  | $\text{Na}_2\text{Fe}(\text{SO}_4)_{1.95}(\text{PO}_3\text{F})_{0.05}\cdot(\text{H}_2\text{O})_2$                                                    | $P2_1/c$     | SO <sub>4</sub> | PO <sub>3</sub> F | 253308         |
| 24  | $\text{Ce}_2(\text{PO}_4)_2(\text{HPO}_4)_{0.4}(\text{SO}_4)_{0.6}\cdot(\text{H}_2\text{O})_5$                                                       | $I2/a$       | SO <sub>4</sub> | PO <sub>4</sub>   | 108907         |
| 25  | $\text{Na}_{12}((\text{Mo}_2\text{O}_4)_4(\text{O}_3\text{PCH}_2\text{PO}_3)_4(\text{SO}_3)_2)\cdot(\text{H}_2\text{O})_{39}$                        | $P\bar{1}$   | SO <sub>3</sub> | PO <sub>3</sub>   | 240359         |
| 26  | $(\text{NH}_4)_{12}((\text{Mo}_2\text{O}_4)_4(\text{O}_3\text{PCH}_2\text{PO}_3)_4(\text{SO}_3)_2)\cdot(\text{H}_2\text{O})_{26}$                    | $P\bar{1}$   | SO <sub>3</sub> | PO <sub>3</sub>   | 240356         |
| 27  | $\text{Na}_2(\text{NH}_4)_{11}((\text{Mo}_2\text{O}_4)_4(\text{O}_3\text{PCH}_2\text{PO}_3)_4(\text{SO}_3)_2)\cdot(\text{H}_2\text{O})_{13}$         | $P\bar{1}$   | SO <sub>3</sub> | PO <sub>3</sub>   | 240361         |
